# Supplementary material for: Lifestyle in progression from hypertensive disorders of pregnancy to chronic hypertension in Nurses’ Health Study II: observational cohort study
Source: PubMed Central journal article supplement — BMJ. 2017 Jul 12;358:j3024. doi: 10.1136/bmj.j3024 (PMC5506852; doi:10.1136/bmj.j3024), 2017-07-12
Supplement: tims037875.ww1.pdf [file tims037875.ww1.pdf]

## **Online supplement**

### **Lifestyle in progression from hypertensive disorders of pregnancy to chronic hypertension in Nurses' Health Study II: observational cohort study**

Timpka S, et al.

#### **Supplementary Tables**

**Supplementary Table A** - The age-, race-, and parity-adjusted association between BMI and chronic hypertension in parous women within categories of HDP history presented as hazard ratios by age

**Supplementary Table B**– The age-, race-, and parity-adjusted association between lifestyle and chronic hypertension in parous women within categories of HDP history presented as hazard ratios by lifestyle risk factor and age

**Supplementary Table C** - Statistics for additive interaction between hypertensive disorders of pregnancy and BMI in multivariable adjusted models of chronic hypertension by age

**Supplementary Table D** - Statistics for additive interaction between HDP and lifestyle in multivariable adjusted models of chronic hypertension by lifestyle risk factor and age

**Supplementary Table A** - The age-, race-, and parity-adjusted association between BMI and chronic hypertension in parous women within categories of HDP history presented as hazard ratios by age

|                        | Events /<br>Person-years | BMI category (Hazard ratio, 95% confidence interval) |                   |                   |                   |                    | p, trend <sup>a</sup> |
|------------------------|--------------------------|------------------------------------------------------|-------------------|-------------------|-------------------|--------------------|-----------------------|
|                        |                          | 18.5 - 22.4                                          | 22.5 - 24.9       | 25.0 - 29.9       | 30.0 - 34.9       | ≥ 35.0             |                       |
| <b>Age 32-39 years</b> |                          |                                                      |                   |                   |                   |                    |                       |
| No HDP                 | 571/88,542               | 1                                                    | 1.92 (1.45, 2.54) | 4.23 (3.30, 5.43) | 6.38 (4.81, 8.46) | 9.58 (7.08, 12.97) | <0.001                |
| History of HDP         | 270/11,401               | 1 <sup>b</sup>                                       | 2.16 (1.29, 3.61) | 3.43 (2.14, 5.48) | 5.60 (3.43, 9.14) | 7.78 (4.76, 12.71) | <0.001                |
| <b>Age 40-49 years</b> |                          |                                                      |                   |                   |                   |                    |                       |
| No HDP                 | 5,695/329,956            | 1                                                    | 1.53 (1.40, 1.68) | 2.72 (2.50, 2.96) | 4.77 (4.36, 5.22) | 6.76 (6.14, 7.44)  | <0.001                |
| History of HDP         | 1,336/32,406             | 1 <sup>b</sup>                                       | 1.48 (1.17, 1.87) | 2.44 (1.99, 3.00) | 3.43 (2.77, 4.24) | 4.24 (3.42, 5.27)  | <0.001                |
| <b>Age 50-59 years</b> |                          |                                                      |                   |                   |                   |                    |                       |
| No HDP                 | 5,343/202,605            | 1                                                    | 1.37 (1.25, 1.51) | 2.25 (2.07, 2.45) | 3.23 (2.94, 3.55) | 4.69 (4.22, 5.21)  | <0.001                |
| History of HDP         | 700/14,624               | 1 <sup>b</sup>                                       | 1.54 (1.12, 2.12) | 2.05 (1.54, 2.73) | 3.09 (2.29, 4.16) | 4.14 (3.03, 5.64)  | <0.001                |

**BMI:** Body Mass Index in kg/m<sup>2</sup>, **DASH:** Dietary approaches to stop hypertension, **HDP:** Hypertensive disorders of pregnancy, **Ref:** Reference

Models include adjustment for age, ethnicity (White, Latina, African-American, Asian, or Other), parity (1, 2, or ≥3 pregnancies), and interaction terms between HDP and BMI categories.

**a** Continuous BMI included in the models instead of categorical BMI

**b** The same model as for "No HDP" except that women with prior HDP and BMI 18.5 to 22.4 constitute the reference group.

**Supplementary Table B**– The age-, race-, and parity-adjusted association between lifestyle and chronic hypertension in parous women within categories of HDP history presented as hazard ratios by lifestyle risk factor and age

| Age 32-39 years        | Events / Person-years | Physical activity in quartiles <sup>a</sup> (Hazard ratio, 95% confidence interval) |                   |                   |                   | p, trend <sup>b</sup> |
|------------------------|-----------------------|-------------------------------------------------------------------------------------|-------------------|-------------------|-------------------|-----------------------|
|                        |                       | Fourth (High)                                                                       | Third             | Second            | First             |                       |
| No HDP                 | 572/90,887            | 1.00 (Ref)                                                                          | 1.28 (1.00, 1.64) | 1.39 (1.09, 1.78) | 1.59 (1.25, 2.03) | <0.001                |
| History of HDP         | 272/11,549            | 1.00 (Ref) <sup>c</sup>                                                             | 1.62 (1.15, 2.29) | 1.28 (0.89, 1.84) | 1.29 (0.89, 1.87) | 0.33                  |
| <b>Age 40-49 years</b> |                       |                                                                                     |                   |                   |                   |                       |
| No HDP                 | 5,716/334,976         | 1.00 (Ref)                                                                          | 1.23 (1.13, 1.33) | 1.35 (1.25, 1.46) | 1.62 (1.50, 1.75) | <0.001                |
| History of HDP         | 1,343/32,646          | 1.00 (Ref) <sup>c</sup>                                                             | 1.27 (1.08, 1.49) | 1.25 (1.07, 1.48) | 1.51 (1.29, 1.77) | <0.001                |
| <b>Age 50-59 years</b> |                       |                                                                                     |                   |                   |                   |                       |
| No HDP                 | 5,366/205,207         | 1.00 (Ref)                                                                          | 1.08 (0.99, 1.16) | 1.26 (1.17, 1.36) | 1.44 (1.33, 1.56) | <0.001                |
| History of HDP         | 702/14,723            | 1.00 (Ref) <sup>c</sup>                                                             | 1.19 (0.95, 1.49) | 1.19 (0.95, 1.49) | 1.62 (1.31, 2.01) | <0.001                |
| Age 32-39 years        | Events / Person-years | DASH diet score in quartiles <sup>a</sup> (Hazard ratio, 95% confidence interval)   |                   |                   |                   | p, trend <sup>b</sup> |
|                        |                       | Fourth (High)                                                                       | Third             | Second            | First             |                       |
| No HDP                 | 572/90,887            | 1.00 (Ref)                                                                          | 1.41 (1.07, 1.86) | 1.58 (1.19, 2.09) | 1.81 (1.39, 2.35) | <0.001                |
| History of HDP         | 272/11,549            | 1.00 (Ref) <sup>c</sup>                                                             | 1.28 (0.88, 1.87) | 1.05 (0.70, 1.57) | 1.31 (0.91, 1.90) | 0.06                  |
| <b>Age 40-49 years</b> |                       |                                                                                     |                   |                   |                   |                       |
| No HDP                 | 5,716/334,976         | 1.00 (Ref)                                                                          | 1.27 (1.17, 1.38) | 1.37 (1.26, 1.48) | 1.63 (1.50, 1.76) | <0.001                |
| History of HDP         | 1,343/32,646          | 1.00 (Ref) <sup>c</sup>                                                             | 1.35 (1.14, 1.59) | 1.14 (0.96, 1.36) | 1.45 (1.23, 1.71) | <0.001                |
| <b>Age 50-59 years</b> |                       |                                                                                     |                   |                   |                   |                       |
| No HDP                 | 5,366/205,207         | 1.00 (Ref)                                                                          | 1.29 (1.20, 1.40) | 1.45 (1.34, 1.56) | 1.55 (1.43, 1.68) | <0.001                |
| History of HDP         | 702/14,723            | 1.00 (Ref) <sup>c</sup>                                                             | 1.07 (0.86, 1.33) | 1.26 (1.01, 1.56) | 1.51 (1.21, 1.87) | <0.001                |
| Age 32-39 years        | Events / Person-years | Na/K intake in quartiles <sup>a</sup> (Hazard ratio, 95% confidence interval)       |                   |                   |                   | p, trend <sup>b</sup> |
|                        |                       | First (Low)                                                                         | Second            | Third             | Fourth            |                       |
| No HDP                 | 572/90,887            | 1.00 (Ref)                                                                          | 1.22 (0.93, 1.58) | 1.14 (0.88, 1.48) | 1.32 (1.03, 1.70) | 0.02                  |
| History of HDP         | 272/11,549            | 1.00 (Ref) <sup>c</sup>                                                             | 1.12 (0.75, 1.68) | 1.32 (0.91, 1.92) | 1.36 (0.94, 1.96) | 0.06                  |
| <b>Age 40-49 years</b> |                       |                                                                                     |                   |                   |                   |                       |
| No HDP                 | 5,716/334,976         | 1.00 (Ref)                                                                          | 1.13 (1.05, 1.23) | 1.28 (1.18, 1.38) | 1.37 (1.27, 1.48) | <0.001                |
| History of HDP         | 1,343/32,646          | 1.00 (Ref) <sup>c</sup>                                                             | 1.08 (0.91, 1.27) | 1.13 (0.97, 1.33) | 1.24 (1.06, 1.45) | <0.001                |
| <b>Age 50-59 years</b> |                       |                                                                                     |                   |                   |                   |                       |
| No HDP                 | 5,366/205,207         | 1.00 (Ref)                                                                          | 1.16 (1.07, 1.25) | 1.31 (1.21, 1.41) | 1.36 (1.26, 1.47) | <0.001                |
| History of HDP         | 702/14,723            | 1.00 (Ref) <sup>c</sup>                                                             | 1.15 (0.92, 1.42) | 1.22 (0.99, 1.51) | 1.39 (1.12, 1.72) | <0.001                |

**DASH:** Dietary Approaches to Stop Hypertension, **HDP:** Hypertensive disorders of pregnancy, **Ref:** Reference

Models include adjustment for age, parity (1, 2, or ≥3 pregnancies), ethnicity (White, Latina, African-American, Asian, or Other), and interaction terms between HDP and lifestyle factor quartiles.

**a** Descending DASH diet score and physical activity and ascending Na/K intake.

**B** Lifestyle risk factor included in the model as a continuous variable (Na/K intake and physical activity as Metabolic Equivalents (METs) are log transformed).

**c** The same model as for "No HDP" except that women with prior HDP in the quartile of lifestyle factor with the highest risk constitute the reference group.

**Supplementary Table C** - Statistics for additive interaction between hypertensive disorders of pregnancy and BMI in multivariable adjusted models of chronic hypertension by age

| Additive Interaction Statistic                                   | Age (years) | BMI Category       |                    |                    |                     |
|------------------------------------------------------------------|-------------|--------------------|--------------------|--------------------|---------------------|
|                                                                  |             | 22.5-24.9          | 25.0-29.9          | 30.0-34.9          | ≥35.0               |
| <b>RERI</b><br>(95% CI, null = 0)                                | 32-39       | 2.35 (0.07, 4.63)  | 4.00 (1.28, 6.71)  | 8.48 (3.31, 13.66) | 12.74 (4.81, 20.67) |
|                                                                  | 40-49       | 0.55 (-0.10, 1.20) | 1.59 (0.90, 2.27)  | 2.00 (0.95, 3.04)  | 2.08 (0.68, 3.48)   |
|                                                                  | 50-59       | 0.59 (-0.06, 1.25) | 0.55 (-0.08, 1.17) | 1.40 (0.44, 2.36)  | 1.92 (0.44, 3.39)   |
| <b>Attributable Proportion<sup>a</sup></b><br>(95% CI, null = 0) | 32-39       | 0.38 (0.01, 0.76)  | 0.39 (0.12, 0.66)  | 0.50 (0.19, 0.81)  | 0.51 (0.19, 0.84)   |
|                                                                  | 40-49       | 0.17 (-0.01, 0.34) | 0.29 (0.17, 0.40)  | 0.25 (0.12, 0.37)  | 0.20 (0.07, 0.34)   |
|                                                                  | 50-59       | 0.23 (0.02, 0.44)  | 0.16 (0.01, 0.30)  | 0.26 (0.09, 0.43)  | 0.25 (0.06, 0.44)   |
| <b>Synergy Index</b><br>(95% CI, null = 1)                       | 32-39       | 1.84 (1.25, 2.43)  | 1.77 (1.41, 2.13)  | 2.12 (1.76, 2.49)  | 2.14 (1.78, 2.50)   |
|                                                                  | 40-49       | 1.31 (0.99, 1.63)  | 1.54 (1.35, 1.73)  | 1.40 (1.23, 1.56)  | 1.29 (1.13, 1.45)   |
|                                                                  | 50-59       | 1.58 (1.05, 2.11)  | 1.29 (0.99, 1.58)  | 1.47 (1.22, 1.72)  | 1.41 (1.17, 1.65)   |

**BMI:** Body mass index in kg/m<sup>2</sup>, **RERI:** Relative excess risk due to interaction

The reference group is BMI 18.5 to 22.4. Underweight women are excluded as the reference group should have the lowest risk in analyses or additive interaction.

**a** The proportion of excess risk that is attributable to the interaction between HDP and BMI (RERI).

**Supplementary Table D - Statistics for additive interaction between HDP and lifestyle in multivariable adjusted models of chronic hypertension by lifestyle risk factor and age**

|                                                                  |             | Physical activity   |                     |                      |
|------------------------------------------------------------------|-------------|---------------------|---------------------|----------------------|
| Additive Interaction Statistic                                   | Age (years) | Third Quartile      | Second Quartile     | First Quartile       |
| <b>RERI</b><br>(95% CI, null = 0)                                | 32-39       | 0.96 (-0.16, 2.08)  | -0.05 (-1.06, 0.97) | -0.32 (-1.31, 0.68)  |
|                                                                  | 40-49       | 0.16 (-0.18, 0.50)  | -0.03 (-0.35, 0.29) | 0.01 (-0.31, 0.33)   |
|                                                                  | 50-59       | 0.13 (-0.23, 0.48)  | -0.02 (-0.37, 0.33) | 0.21 (-0.14, 0.56)   |
| <b>Attributable Proportion<sup>a</sup></b><br>(95% CI, null = 0) | 32-39       | 0.26 (-0.03, 0.54)  | -0.02 (-0.32, 0.29) | -0.13 (-0.45, 0.19)  |
|                                                                  | 40-49       | 0.08 (-0.05, 0.20)  | -0.02 (-0.14, 0.11) | 0.01 (-0.12, 0.13)   |
|                                                                  | 50-59       | 0.08 (-0.09, 0.25)  | -0.01 (-0.18, 0.16) | 0.12 (-0.03, 0.28)   |
| <b>Synergy Index</b><br>(95% CI, null = 1)                       | 32-39       | 1.53 (1.01, 2.06)   | 0.97 (0.39, 1.56)   | 0.82 (0.20, 1.43)    |
|                                                                  | 40-49       | 1.17 (0.83, 1.50)   | 0.96 (0.62, 1.31)   | 1.01 (0.69, 1.33)    |
|                                                                  | 50-59       | 1.28 (0.57, 1.98)   | 0.96 (0.28, 1.65)   | 1.42 (0.80, 2.05)    |
|                                                                  |             | DASH diet           |                     |                      |
| Additive Interaction Statistic                                   | Age (years) | Third Quartile      | Second Quartile     | First Quartile       |
| <b>RERI</b><br>(95% CI, null = 0)                                | 32-39       | 0.16 (-1.19, 1.50)  | -0.73 (-2.07, 0.62) | -0.003 (-1.32, 1.32) |
|                                                                  | 40-49       | 0.33 (-0.08, 0.70)  | -0.15 (-0.50, 0.21) | 0.11 (-0.26, 0.47)   |
|                                                                  | 50-59       | -0.16 (-0.55, 0.23) | 0.03 (-0.38, 0.44)  | 0.21 (-0.23, 0.65)   |
| <b>Attributable Proportion<sup>a</sup></b><br>(95% CI, null = 0) | 32-39       | 0.04 (-0.27, 0.35)  | -0.25 (-0.59, 0.09) | -0.001 (-0.29, 0.29) |
|                                                                  | 40-49       | 0.14 (0.02, 0.26)   | -0.08 (-0.21, 0.06) | 0.05 (-0.08, 0.17)   |
|                                                                  | 50-59       | -0.10 (-0.26, 0.07) | 0.02 (-0.14, 0.17)  | 0.09 (-0.07, 0.26)   |
| <b>Synergy Index</b><br>(95% CI, null = 1)                       | 32-39       | 1.06 (0.54, 1.58)   | 0.73 (0.16, 1.29)   | 1.00 (0.52, 1.48)    |
|                                                                  | 40-49       | 1.31 (1.00, 1.61)   | 0.87 (0.54, 1.20)   | 1.08 (0.80, 1.36)    |
|                                                                  | 50-59       | 0.82 (0.35, 1.29)   | 1.03 (0.62, 1.45)   | 1.21 (0.81, 1.61)    |
|                                                                  |             | Na/K intake         |                     |                      |
| Additive Interaction Statistic                                   | Age (years) | Second Quartile     | Third Quartile      | Fourth Quartile      |
| <b>RERI</b><br>(95% CI, null = 0)                                | 32-39       | 0.28 (-0.79, 1.35)  | 0.41 (0.59, 1.41)   | 0.20 (-0.77, 1.18)   |
|                                                                  | 40-49       | -0.03 (-0.37, 0.31) | -0.14 (-0.47, 0.20) | -0.09 (-0.42, 0.23)  |
|                                                                  | 50-59       | -0.02 (-0.39, 0.35) | -0.01 (-0.38, 0.36) | 0.12 (-0.26, 0.51)   |
| <b>Attributable Proportion<sup>a</sup></b><br>(95% CI, null = 0) | 32-39       | 0.10 (-0.23, 0.43)  | 0.15 (-0.16, 0.45)  | 0.08 (-0.22, 0.37)   |
|                                                                  | 40-49       | -0.01 (-0.14, 0.12) | -0.07 (-0.20, 0.06) | -0.05 (-0.17, 0.08)  |
|                                                                  | 50-59       | -0.01 (-0.18, 0.16) | -0.01 (-0.17, 0.15) | 0.07 (-0.10, 0.23)   |
| <b>Synergy Index</b><br>(95% CI, null = 1)                       | 32-39       | 1.19 (0.51, 1.86)   | 1.29 (0.62, 1.96)   | 1.14 (0.51, 1.77)    |
|                                                                  | 40-49       | 0.98 (0.64, 1.31)   | 0.88 (0.56, 1.19)   | 0.92 (0.61, 1.22)    |
|                                                                  | 50-59       | 0.97 (0.43, 1.51)   | 0.98 (0.50, 1.47)   | 1.17 (0.68, 1.65)    |

DASH: Dietary Approaches to Stop Hypertension, HDP: Hypertensive disorders of pregnancy, RERI: Relative excess risk due to interaction

Reference group for each exposure is the quartile with the lowest *a priori* risk.

<sup>a</sup> The proportion of excess risk that is attributable to the interaction between prior HDP and the lifestyle risk factor (RERI).
